# Supplementary material for: AoMae1 Regulates Hyphal Fusion, Lipid Droplet Accumulation, Conidiation, and Trap Formation in Arthrobotrys oligospora
Source: MDPI journal article supplement (doi:10.3390/jof9040496), 2023-04-21
Supplement: s1 [file s1]

Supporting Information

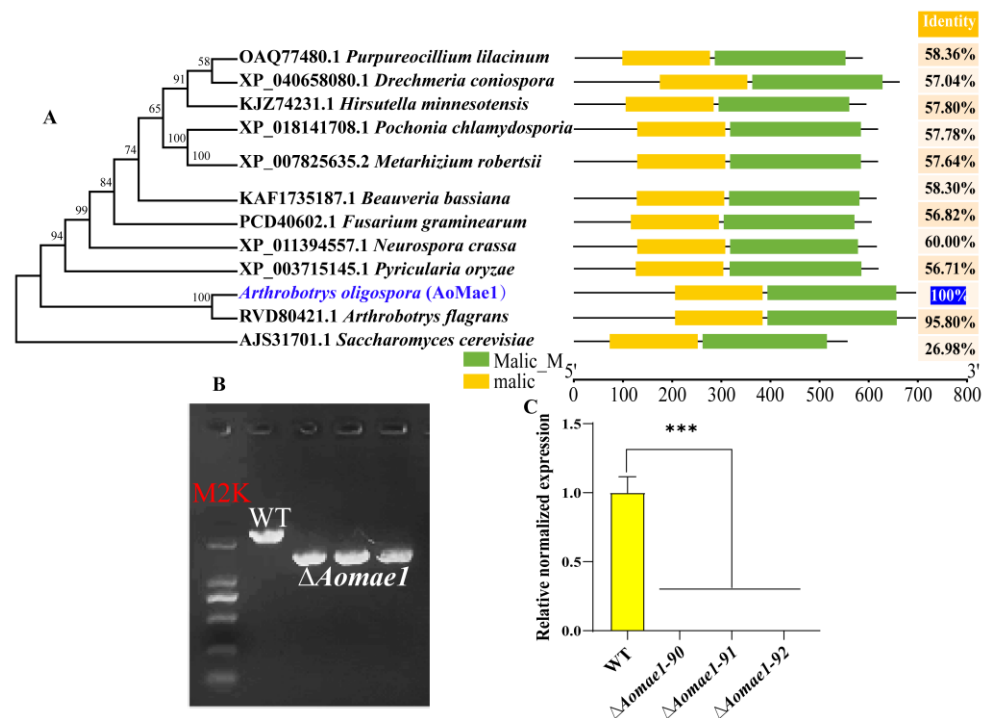

**Figure S1.** Phylogenetic analysis and validation of *Aomae1* knockout strain. A Phylogenetic and structure domain analysis of Mae1 orthologs from different fungi. (B and C) Validation of knockout strains by PCR (B) and RT-PCR (C). M2K, DNA marker. An asterisk indicates a significant difference between the  $\Delta Aomae1$  mutant and the WT strain (Tukey's HSD, \* $p < 0.01$ ).

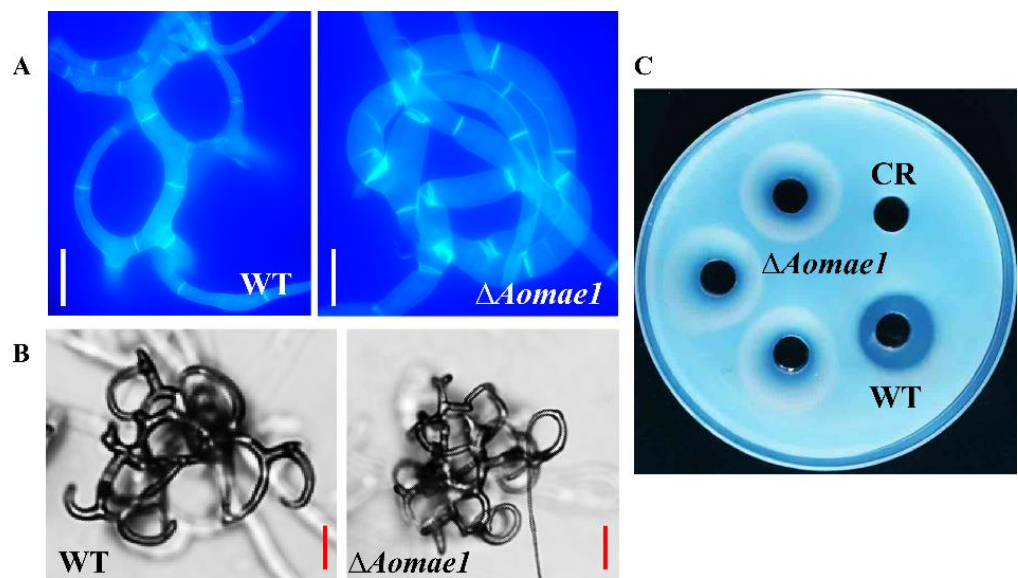

**Figure S2.** Trap morphology and extracellular protease activity. A. Trap morphology was observed by CFW staining. Scale bar = 10  $\mu$ m. B. Trap morphology was observed by a light microscopy. Scale bar = 20  $\mu$ m. C. Comparison of extracellular protease activity. CR, the PD broth was used as a control sample.

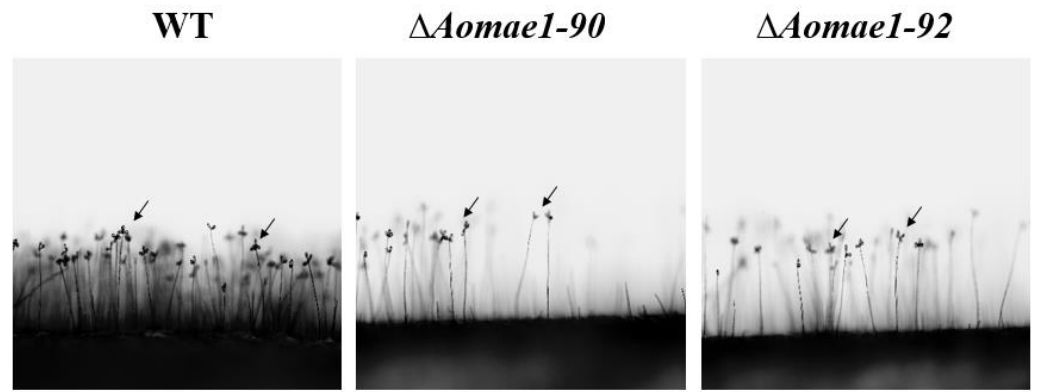

**Figure S3.** Observation of conidiophores and sporulation the WT and mutants on CMY medium. Black arrows: conidia.

**Table S1.** Information of the plasmids used in this study.

| Plasmids | Selection marker | Application                              |
|----------|------------------|------------------------------------------|
| pCSN44   | hph+             | For hygromycin resistance                |
| pRS426   | Amp+             | For constructing the disruption fragment |

**Table S2.** List of primers used for gene manipulation in this study.

| Primers   | Sequences                                          | Application                             |
|-----------|----------------------------------------------------|-----------------------------------------|
| AoMae1-5F | GTAACGCCAGGGTTTTCCAGTCACGACGGTGTGATTTTCAGGCGGGGA   | Amplify the <i>Aomae1</i> gene 5' flank |
| AoMae1-5R | ATCCACTTAACGTTACTGAAATCTCCAACCTCCCATACCTTGCATTGTCC |                                         |
| AoMae1-3F | CTCCTTCAATATCATCTTCTGTCTCCGACGGGGTGCTTGTTCTTGAT    | Amplify the <i>Aomae1</i> gene 3' flank |
| AoMae1-3R | GCGGATAACAATTTACACAGGAAACAGCCTATTCCCTGTTTCCCGCGT   |                                         |
| Hph-f     | GTCGGAGACAGAAGATGATATTGAAGGAGC                     | Amplify the <i>hph</i> cassette         |
| Hph-r     | GTTGGAGATTTCAGTAACGTTAAGTGGAT                      |                                         |
| Mae1-PF   | GGACAATGCAAAGGTATGGGAG                             | Primers for PCR verification            |
| Mae1-PR   | ATCCAAGAACCAAGCACCCC                               |                                         |
| Mae1-RF   | ATGATTATCCAGTTTGAGGA                               | Primers for RT-qPCR verification        |
| Mae1-RR   | TGGCAACACCAACACCAGCA                               |                                         |
